# Supplementary material
Source: PubMed Central journal article supplement (PMC3393429)
Supplement: supp_56.7.3516_FigS1-S5.pdf [file supp_56.7.3516_FigS1-S5.pdf]

# Supple. Fig. 1

(a)

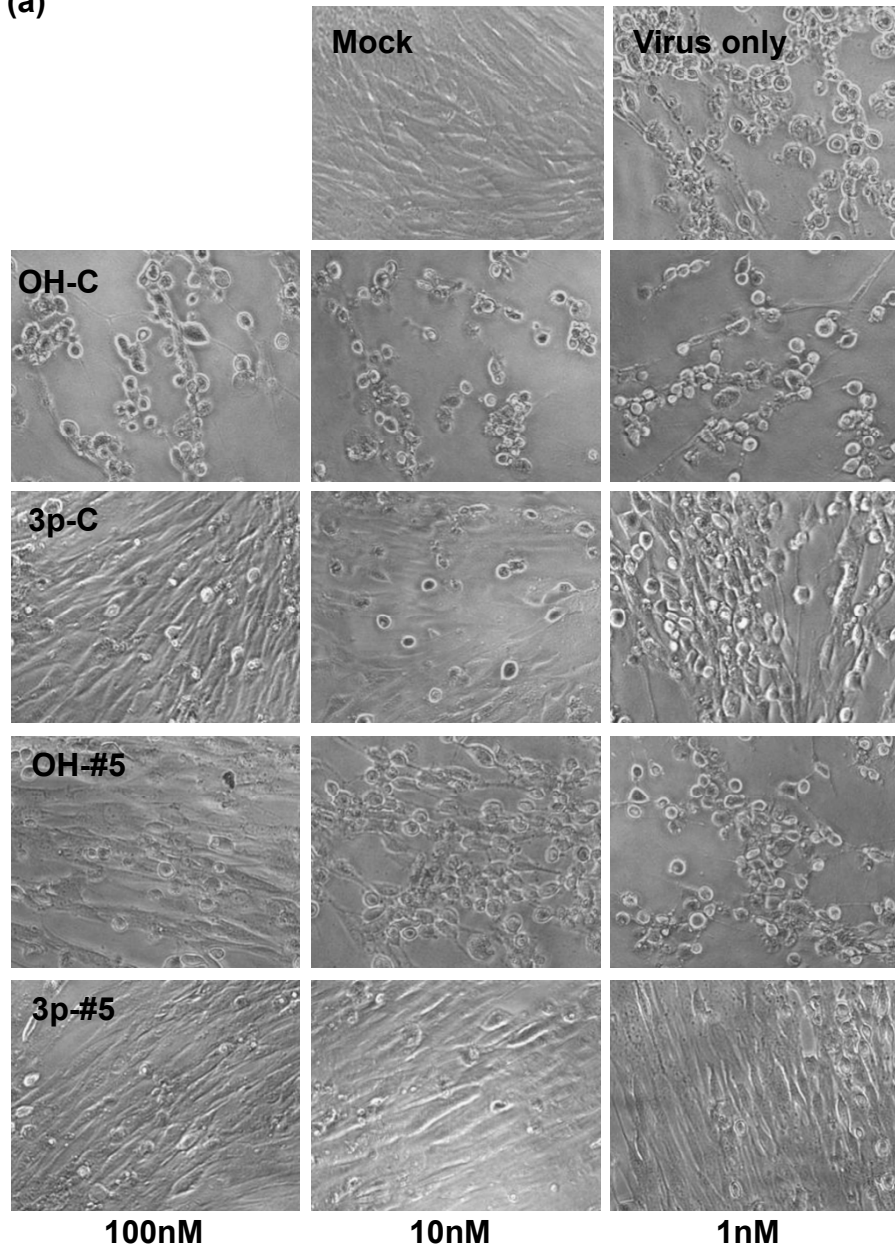

(b)

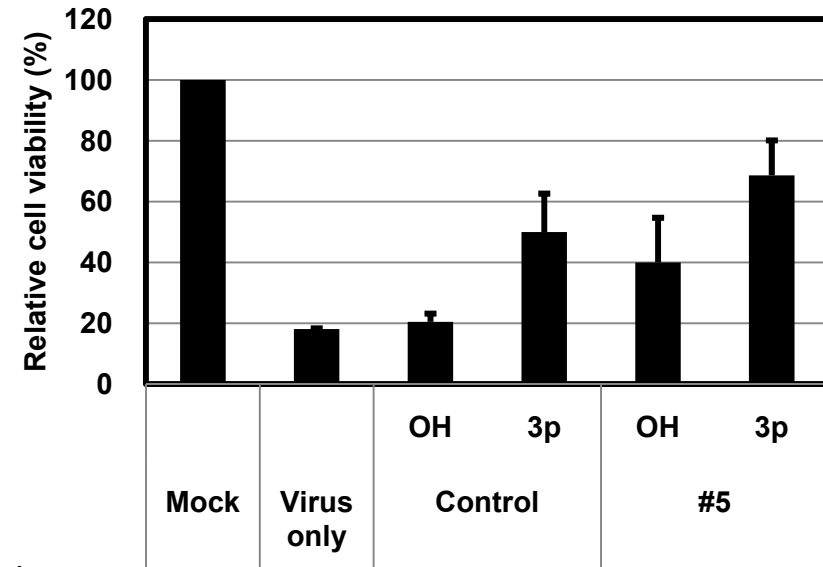

(c)

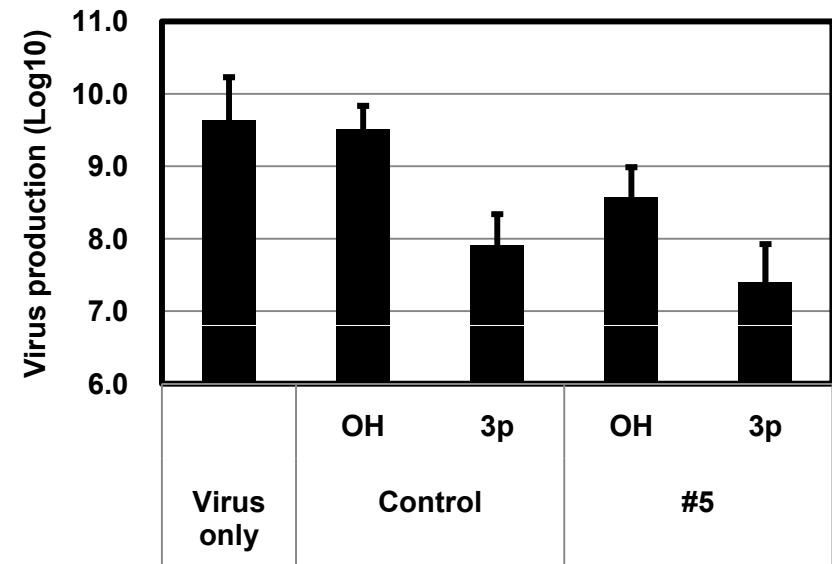

**Supplementary figure 1.** Protection effects of CVB3-specific 3p-siRNA in MRC5 cells. Cells were infected with CVB3 at MOI=1 for 1 hour in the presence or absence of various types of siRNAs at 1, 10, or 100 nM (n=3). After washing the virus inoculum, the cells were cultured for 24 hours. Cytopathic effects were observed under light microscopy (a; the representatives of the independent studies). Relative cell viability and the degree of virus replication were determined at 10 nM by MTT assay (b) and TCID<sub>50</sub> (c), respectively. The mean  $\pm$  SD.

Supple. Fig. 2

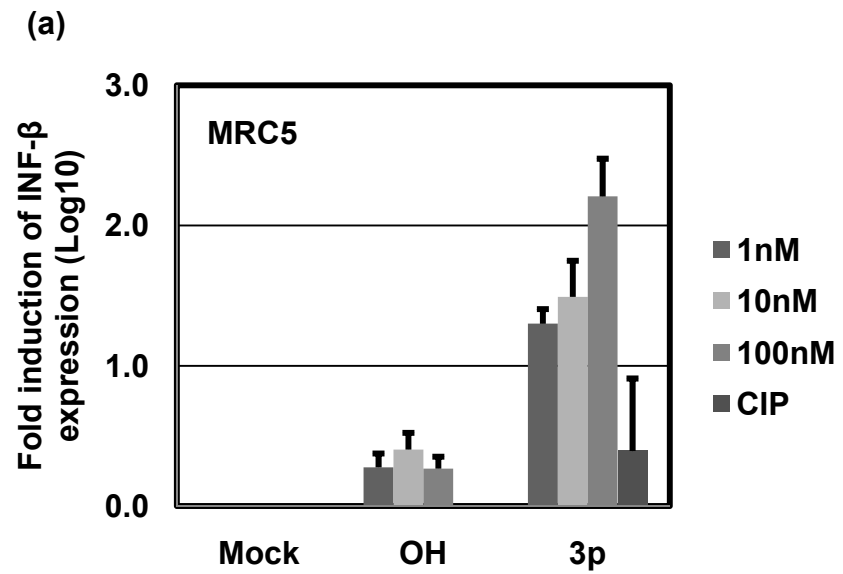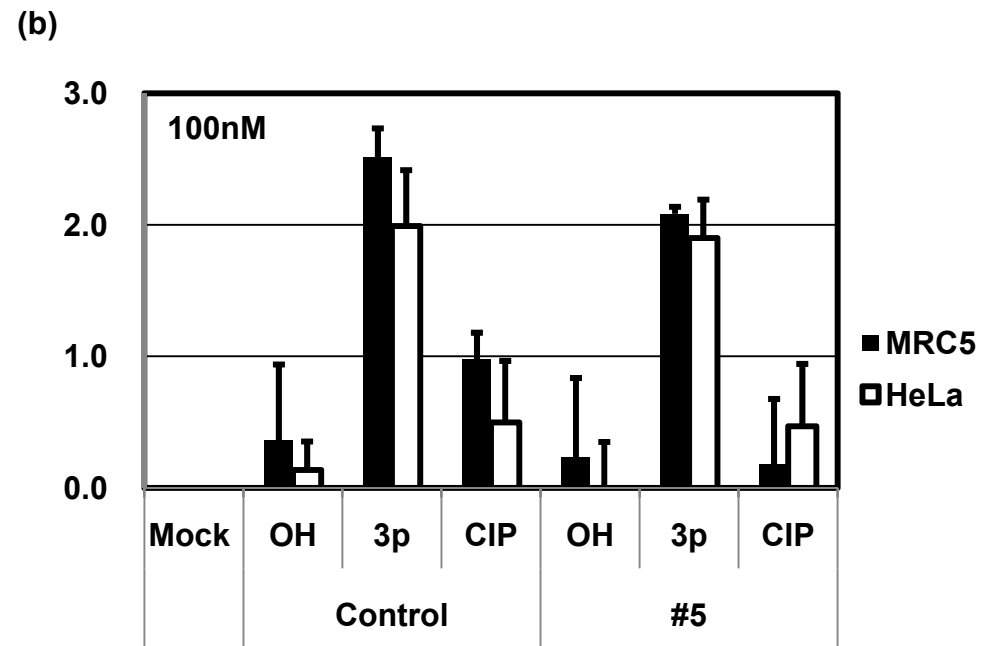

**Supplementary figure 2.** Induction of INF- $\beta$  expression following siRNA treatment in cells. Either MRC5 or HeLa cells were treated with various types of siRNAs at 1, 10, 100 nM for 24 hours. Real time RT-PCR was carried out to quantify INF- $\beta$  mRNA expression. Beta actin was used for normalization in the estimation of relative gene expression. Fold induction of INF- $\beta$  expression in MRC5 cells at different concentration of #5 (a) and in the cells at 100 nM (b) were shown (n=3). Beta actin was used for normalization in the estimation of relative gene expression. CIP; calf intestine phosphatase-treated siRNAs (100 nM). The mean  $\pm$  SD.

Supple. Fig. 3

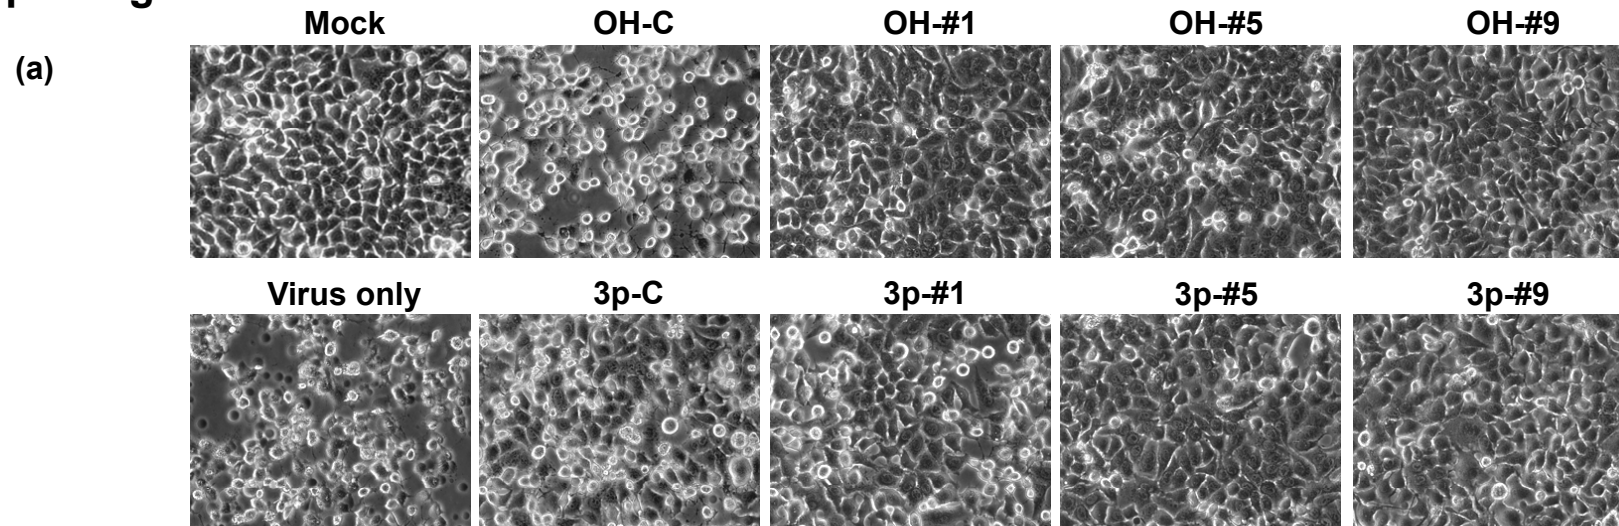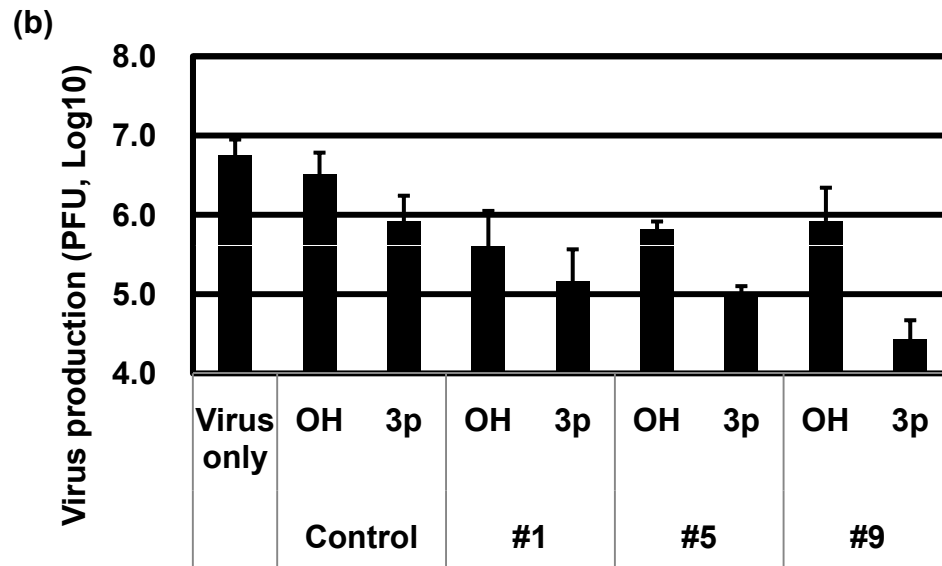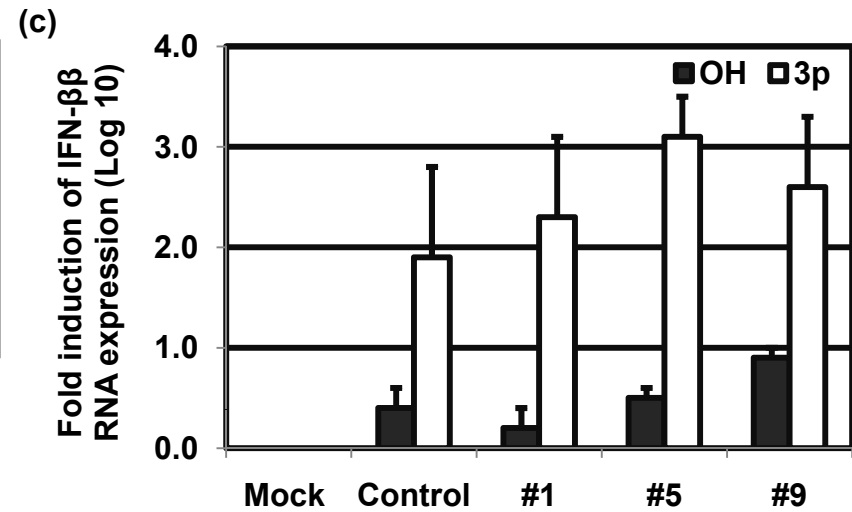

**Supplementary figure 3.** Characteristics of various siRNAs *in vitro*. HeLa cells were preincubated with various types of siRNAs at 100 nM for 15 hours, followed by CVB3 infection at MOI=1. Cytopathic effects were observed under light microscopy at 10 h pi (a, the representatives of 3 independent studies). Cells and culture media were collected at 8 h pi and progeny virus production was determined by TCID<sub>50</sub> (b, n=4). To quantify INF- $\beta$  mRNA expression, MRC5 cells were treated with various types of siRNAs at 10 nM for 24 hours (c, n=3). Real time RT-PCR was carried out and beta actin was used for normalization in the estimation of relative gene expression. The mean  $\pm$  SD.

Supple. Fig. 4

(a)

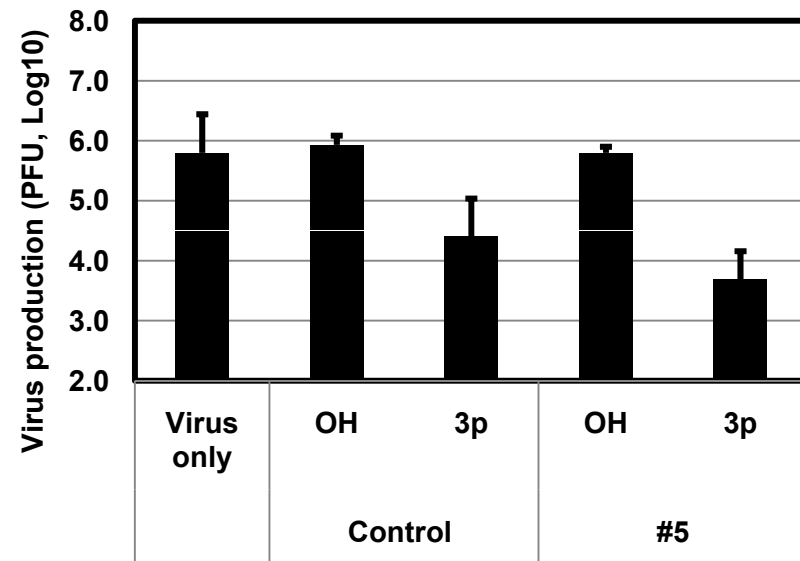

(b)

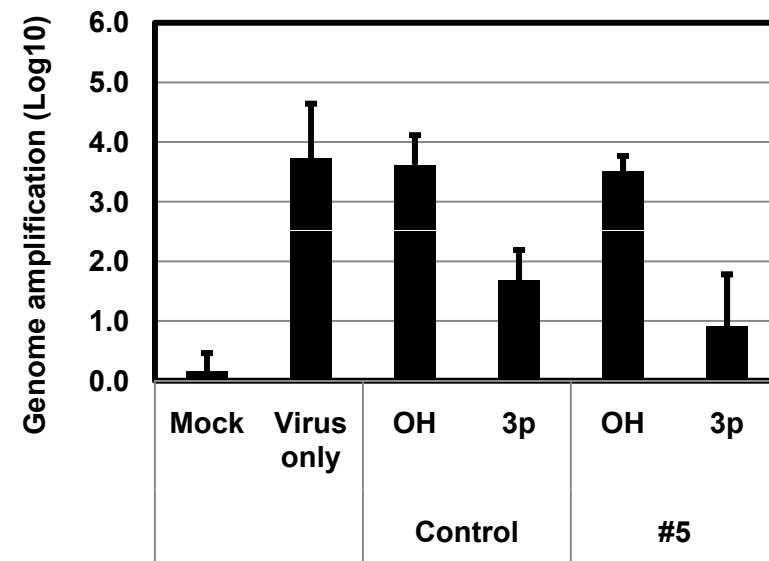

**Supplementary figure 4.** Virus replication in heart tissues following various siRNA treatments. Mice were injected intraperitoneally with  $8 \times 10^5$  PFU/200 $\mu$ l of virus and intravenously administered with 2.5 mg/kg of various siRNAs per mouse after 8 h. Progeny virus production was tested by TCID<sub>50</sub> on day 7 (a, n=3 for each group). The viral genome was quantified on day 14 using RT-PCR (b, n $\geq$ 4 for each group). The mean  $\pm$  SD.



# Supple. Fig. 5

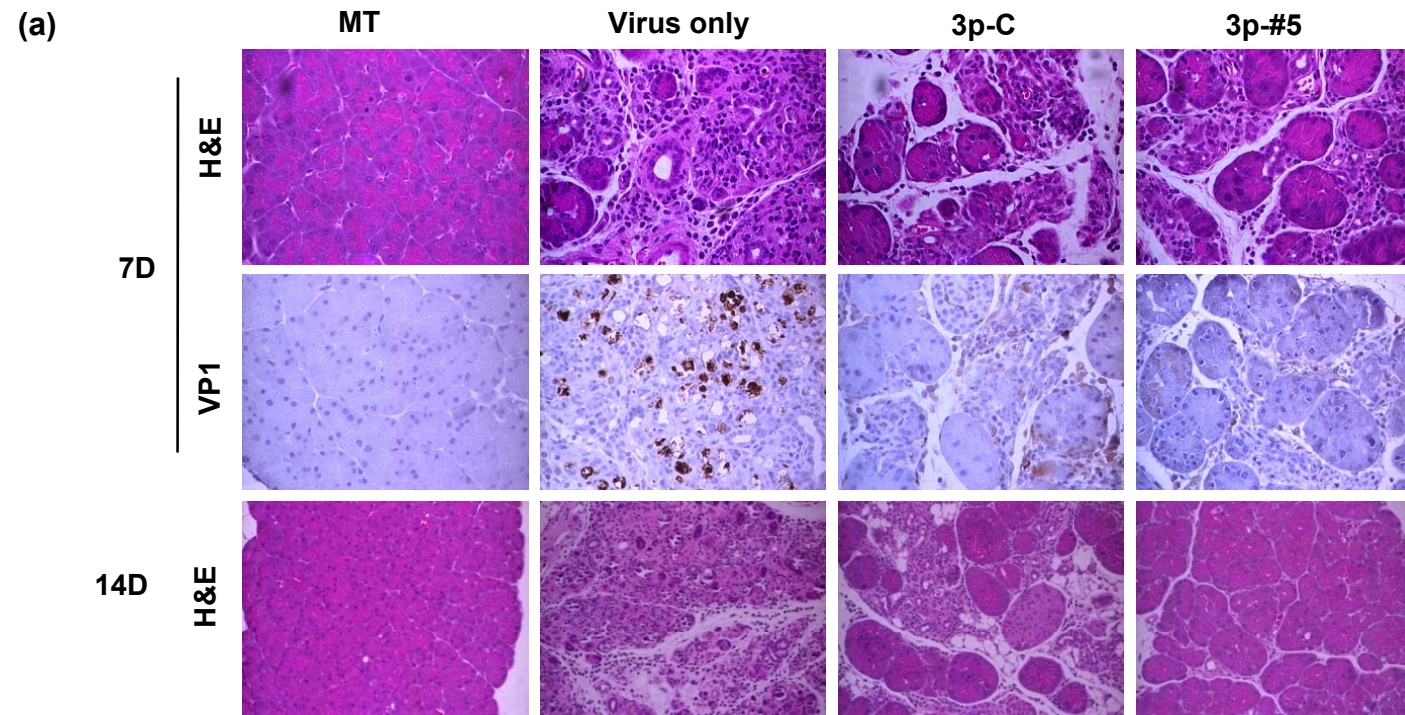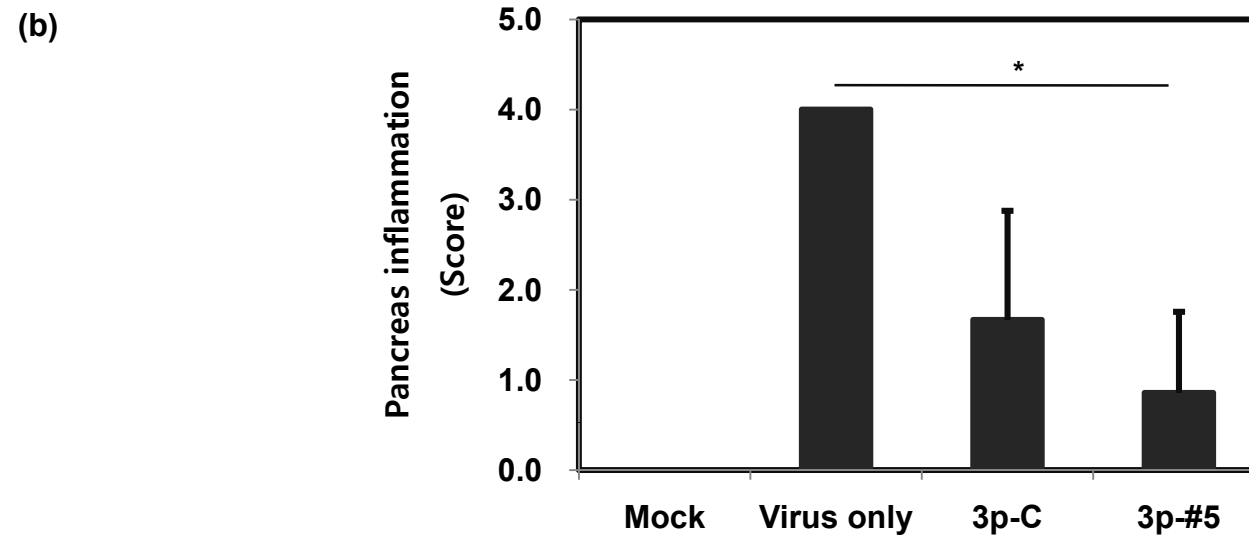

**Supplementary figure 5.** Histopathological examination of pancreas following virus and siRNA treatment.

Pancreases were recovered and paraffin blocks were prepared for histopathological analysis, as described in Fig. 4 (n=6). Sections were stained with H&E and immunohistochemically stained using virus-specific VP1 antibody (a). Pancreas inflammation on day 7 was scored on day 7 (b). The mean  $\pm$  SD. \*P<0.05.
